# Supplementary material for: Direct and indirect regulation of Pom1 cell size pathway by the protein phosphatase 2C Ptc1
Source: PubMed Central journal article supplement — Mol Biol Cell. 2021 Apr 15;32(8):703–11. doi: 10.1091/mbc.E20-08-0508 (PMC8108516; doi:10.1091/mbc.e20-08-0508), 2021-04-15
Supplement: mbc-32-703-s001.pdf [file mbc-32-703-s001.pdf]

# Supplemental Materials

*Molecular Biology of the Cell*

Gerganova et al.

Figure S1

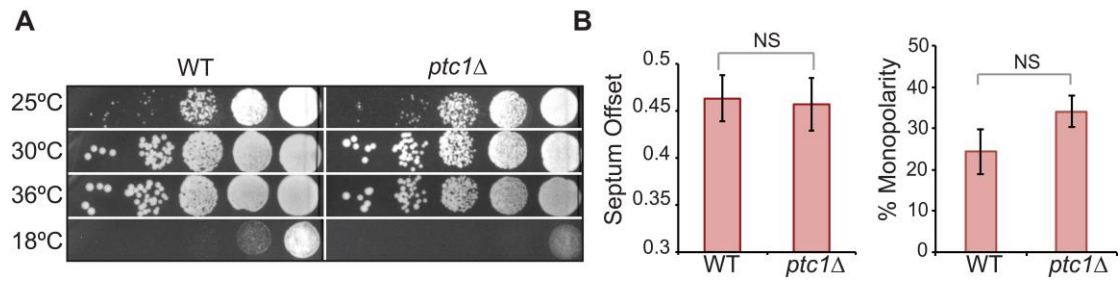

**Figure S1: *ptc1Δ* cells are not temperature sensitive.** **A.** Serial dilution assay of wild type and *ptc1Δ* cells at different temperatures. **B.** Septum offset quantification in wild type and *ptc1Δ* cells. More than 120 cells per strain were counted from 2 independent experiments. Right: percentage of monopolar cells from wild type and *ptc1Δ* strains. More than 100 septated cells were counted from 3 independent experiments. *p-values* determined using student t-test.

Figure S2

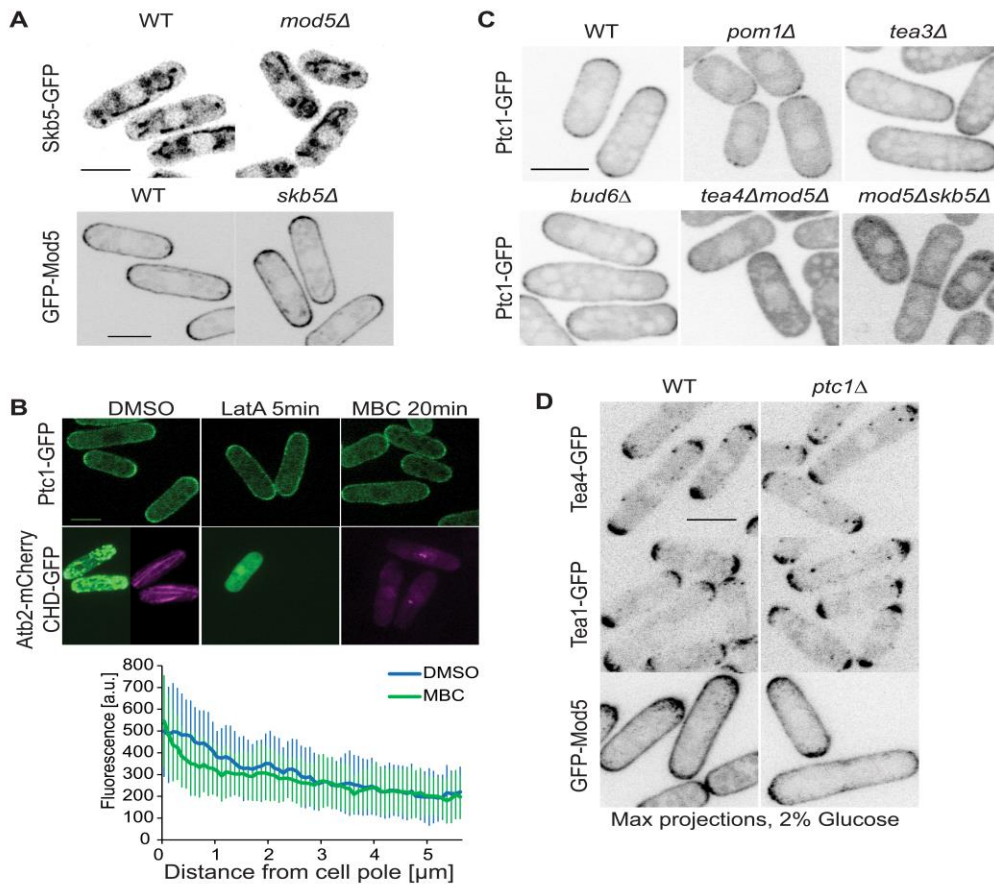

**Figure S2: Investigation of Ptc1 localization.** **A.** Localization of Skb5-GFP in WT and *mod5Δ* cells and GFP-Mod5 in WT and *skb5Δ* cells (widefield microscopy). Insets show magnifications of selected cell poles. **B.** Localization of Ptc1-GFP in MBC and LatA treated cells. Top row: Cells were treated with DMSO, 200 $\mu$ M LatA for 5', and 25 $\mu$ g/ml MBC for 20' and imaged using confocal microscope. Max projections of 14 z-slices are shown. Middle row: Cells with labeled mCherry-Atb2 and CHD-

GFP were treated and imaged similarly as above to serve as controls for effective depolymerization of MTs and F-actin upon drug treatment. LatA treatment effectively removed actin cables and patches. MBC treatment effectively destroyed interphase MTs. Bottom: average profile from quantification of Ptc1-GFP fluorescence intensity along the cortex of 16 cells treated with MBC or DMSO control for 20min. Quantifications done on sum projections of 14 z-slices. Error bars are standard deviations. **C.** Localization of Ptc1-GFP in WT, *pom1* $\Delta$ , *bud6* $\Delta$ , *tea3* $\Delta$ , *tea4* $\Delta$ *mod5* $\Delta$  and *mod5* $\Delta$ *skb5* $\Delta$  cells. Note the residual localization of Ptc1 at the division site of *mod5* $\Delta$ *skb5* $\Delta$  cells. **D.** Localization of Tea4-GFP, Tea1-GFP and GFP-Mod5 in WT and *ptc1* $\Delta$ . Scale bars: 5 $\mu$ m.

Figure S3

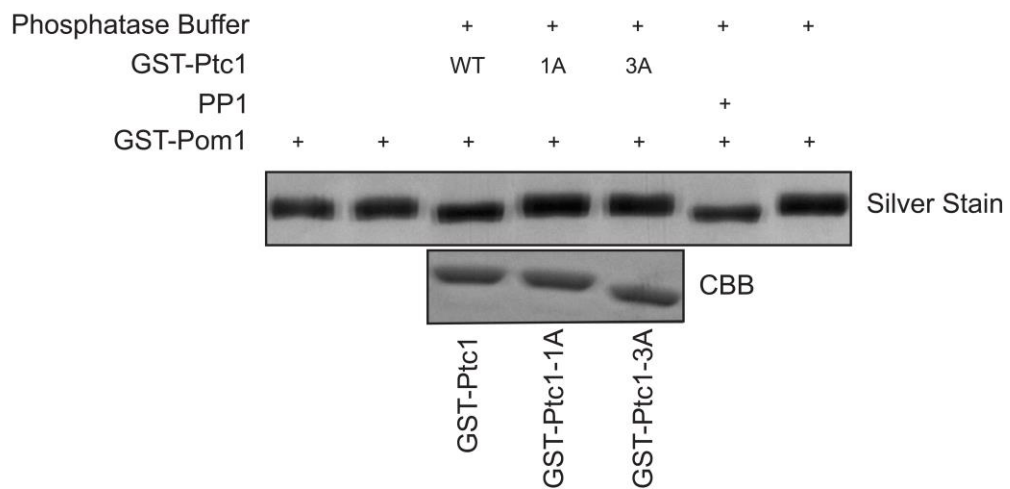

**Figure S3: Ptc1 phosphatase activity in vitro.** In-vitro phosphatase assay. Purified proteins were incubated in phosphatase buffer at 37°C for 1.5h. Top: GST-Pom1 shift revealed using silver staining. Bottom: Loading control for GST-Ptc1 proteins revealed using Coomassie blue staining (CBB).

Figure S4

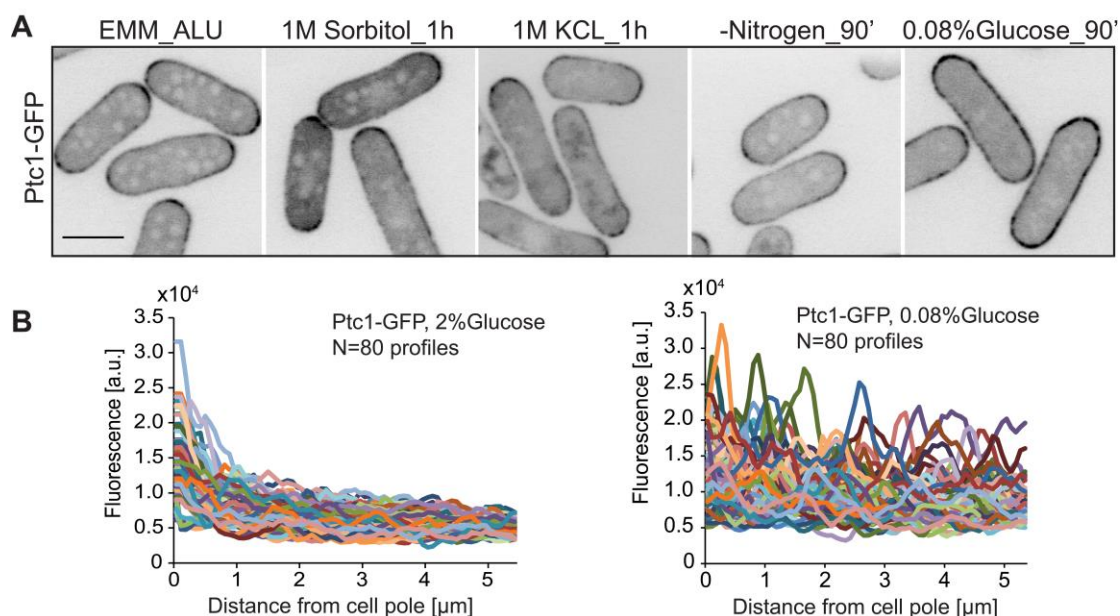

**Figure S4: Controls for Pom1 and Ptc1 localization.** **A.** Localization of Ptc1-GFP in different stresses. Cells were grown in EMM-ALU for 24h and then treated with 1M sorbitol, or 1M KCL for 1h before imaging. For nutrient starvation, cells grown in EMM-ALU were washed 3 times and shifted to EMM-ALU lacking nitrogen, or in EMM-ALU with 0.08% glucose for 90' before imaging. Sum projections of 5 confocal images acquired over time are shown. Scale bar: 5μm. **B.** Traces of individual Ptc1-GFP fluorescence profiles for n=20 cells grown in EMM-ALU 2% glucose for 24h (left panel) and shifted to 0.08% glucose for 1h before imaging (right panel). Quantified on mid-plane sum projections of 5 consecutive snapshots. Error bars are standard deviations.

**Table S1: Cell length at division of indicated genotypes**

**Table S2: *S. pombe* strains used in this study.**
